# Supplementary material for: Glucocorticoid receptor-mediated Nr1d1 chromatin circadian misalignment in stress-induced irritable bowel syndrome
Source: PubMed Central journal article supplement — iScience. 2023 Jun 17;26(7):107137. doi: 10.1016/j.isci.2023.107137 (PMC10316663; doi:10.1016/j.isci.2023.107137), 2023-06-17
Supplement: mmc1.pdf [file mmc1.pdf]

**Supplemental information**

**Glucocorticoid receptor-mediated *Nr1d1*  
chromatin circadian misalignment  
in stress-induced irritable bowel syndrome**

**Gen Zheng, Suya Pang, Junbao Wang, Fangyu Wang, Qi Wang, Lili Yang, Mengdie Ji, Dejian Xie, Shengtao Zhu, Yang Chen, Yan Zhou, Gerald A. Higgins, John W. Wiley, Xiaohua Hou, and Rong Lin**

# Supplementary Information

## Supplementary Figures

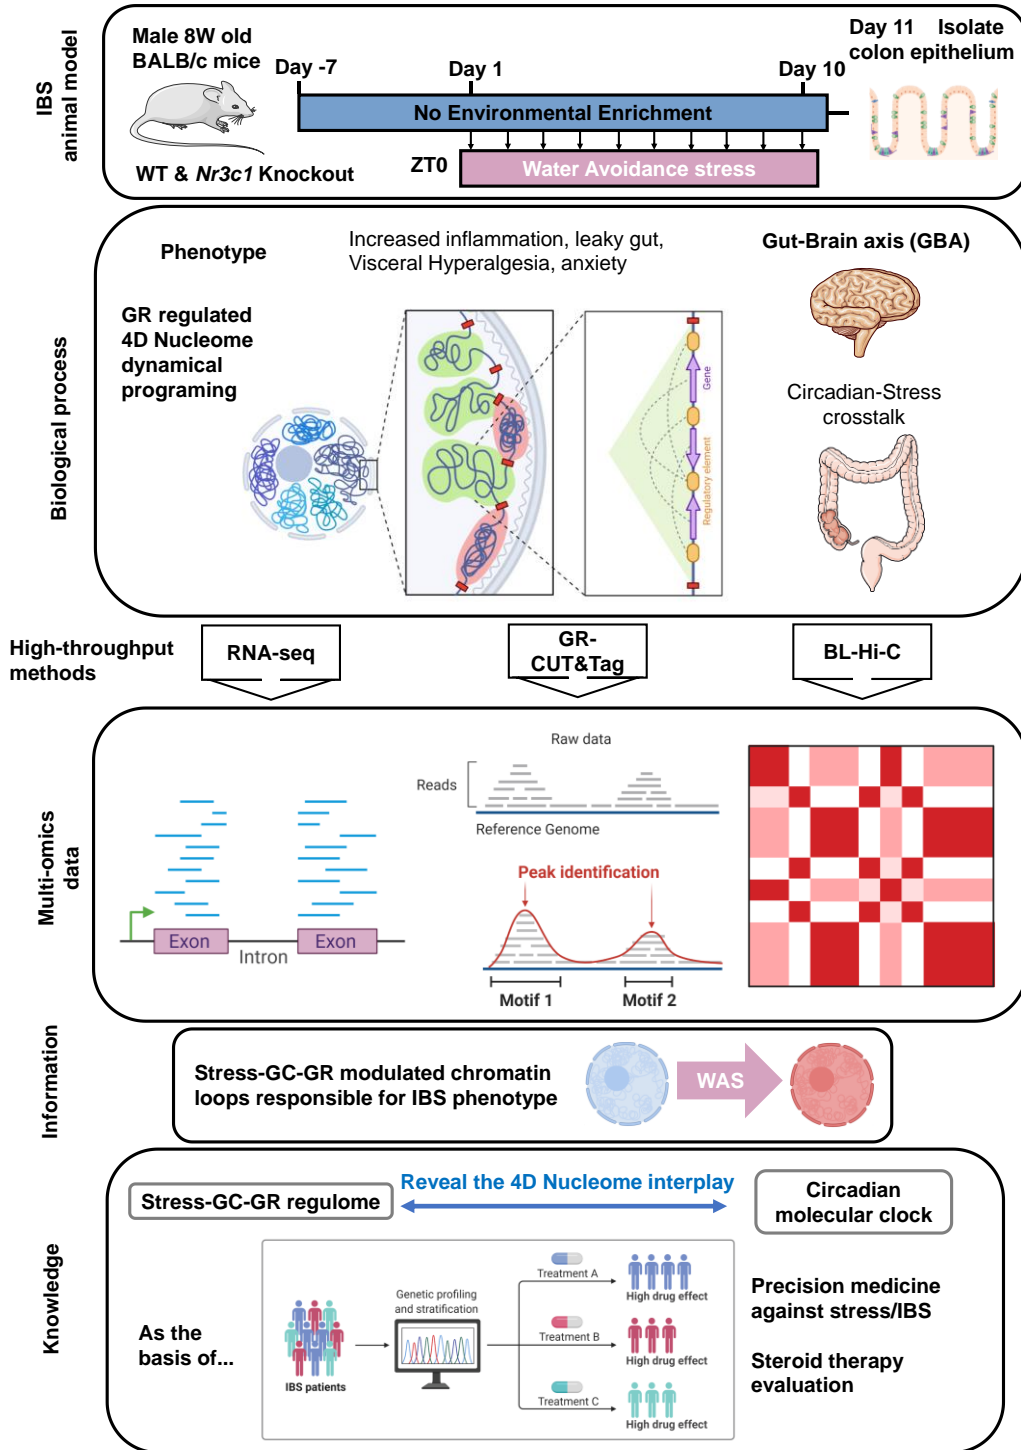

### **Figure S1. Study design**

We used WAS animal model to test our hypothesized IBS 4D nucleome pathogenesis pathway and generated RNA-Seq, GR ChIP-seq, and Hi-C datasets to explore the transcriptional regulation by GR. Conserved circadian-stress crosstalk has translational potential in precision medicine.

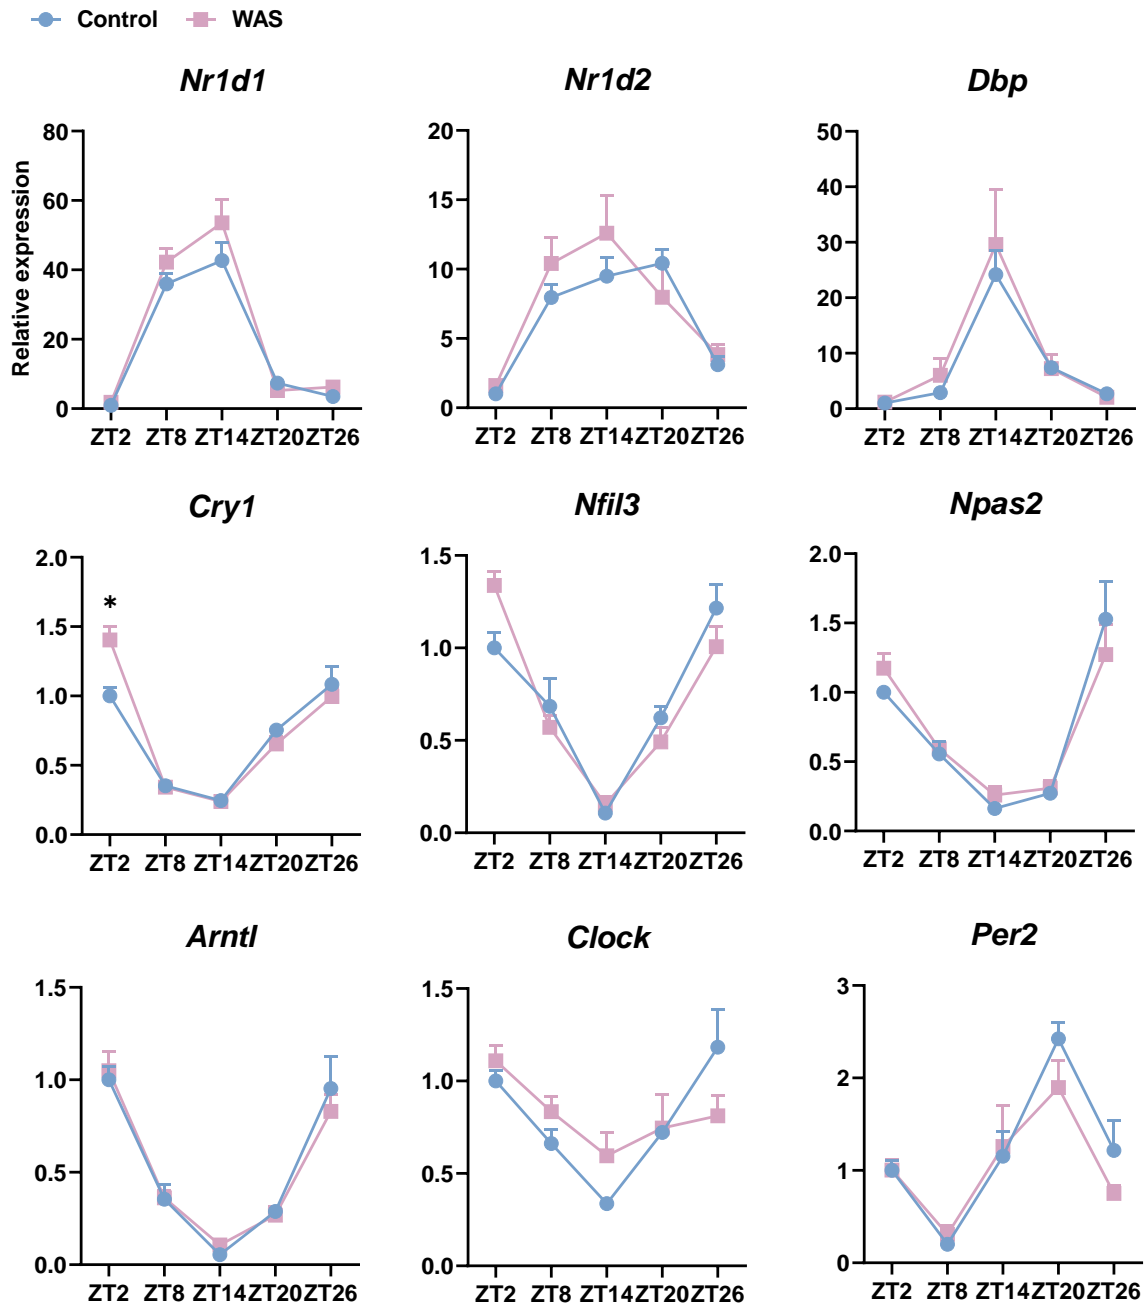

**Figure S2. Stress-induced circadian disturbances in colon epithelial cells, Related to Figure**

**1**

Colon epithelial cells of control (CT) and stressed (WAS) mice were isolated for qPCR analysis.

Stress significantly increased *Cry1* at ZT2. Data are expressed as means  $\pm$  standard error. Data

from multiple time points were analyzed with the Mann-Whitney test (\*,  $P < 0.05$ ;  $N = 5$ ).

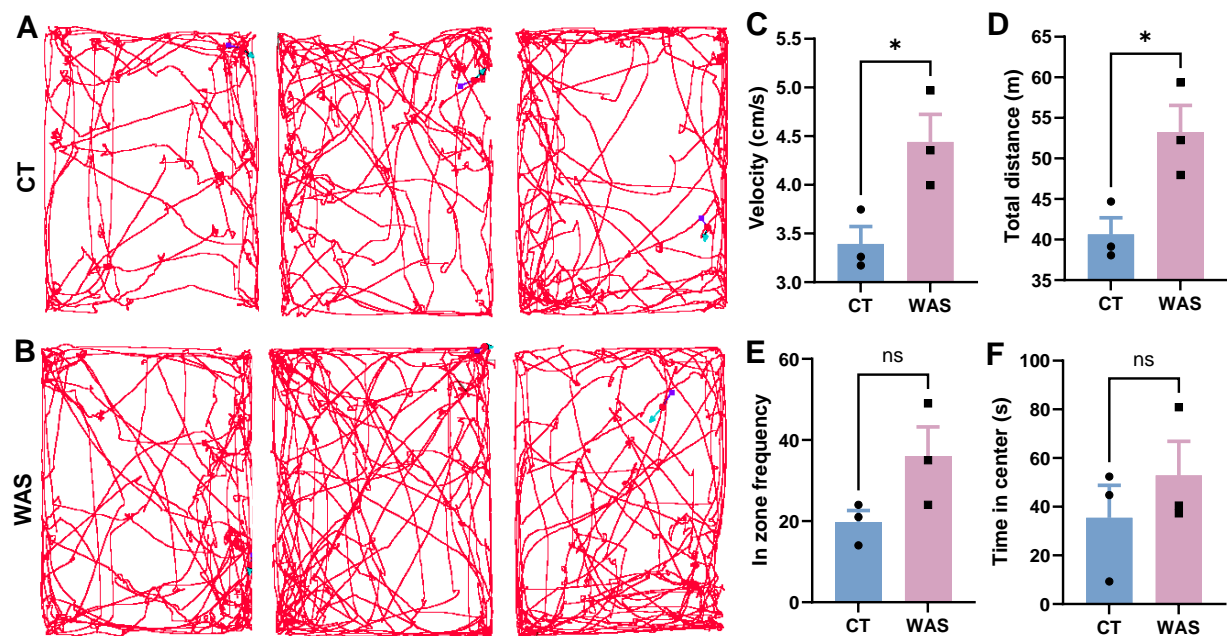

**Figure S3. Water avoidance stress (WAS) induced anxiety behavior in the open-field test, Related to Figure 2**

(A, B) Representative traces of CT (control) and WAS mice in the open-field arena.

(C-F) Quantification of velocity (C), total distance (D), number of entries into the center (E), and time in the center (F) in the open-field test. Data are expressed as means  $\pm$  standard error. Statistical significance was determined using an unpaired *t*-test with Welch's correction (\*,  $P < 0.05$ ;  $N = 3$ ).

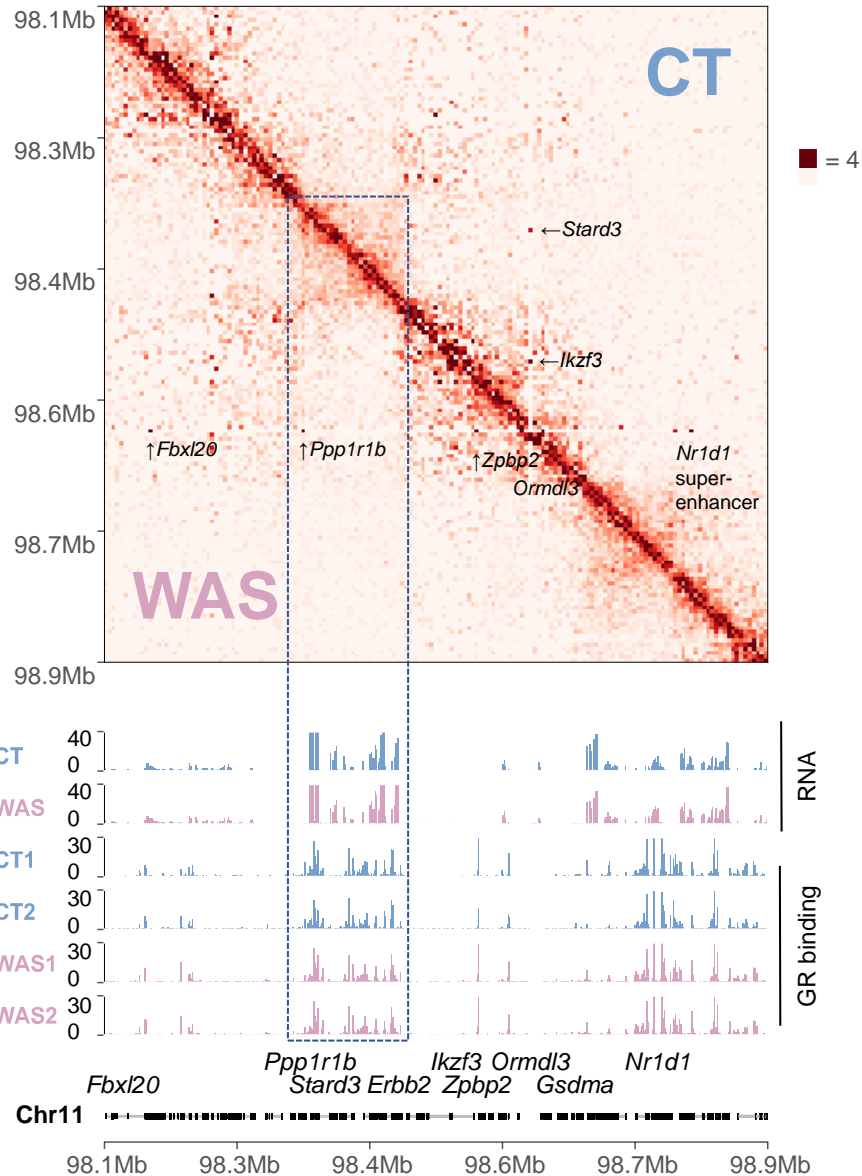

**Figure S4. WAS induced *Fbxl20-Ormdl3* and *Ppp1r1b-Ormdl3* chromatin loops replaced the *Stard3-Ormdl3* loop in CT, Related to Figure 4**

BL-Hi-C was performed with colon IECs isolated from two control (CT) & two water avoidance stressed (WAS) BALB/c mice; data from each group were combined for visualization; each RNA track represents the combined RNA-Seq data from three mice; GR-CUT&Tag tracks are also shown. Expanded view of Figure 4.

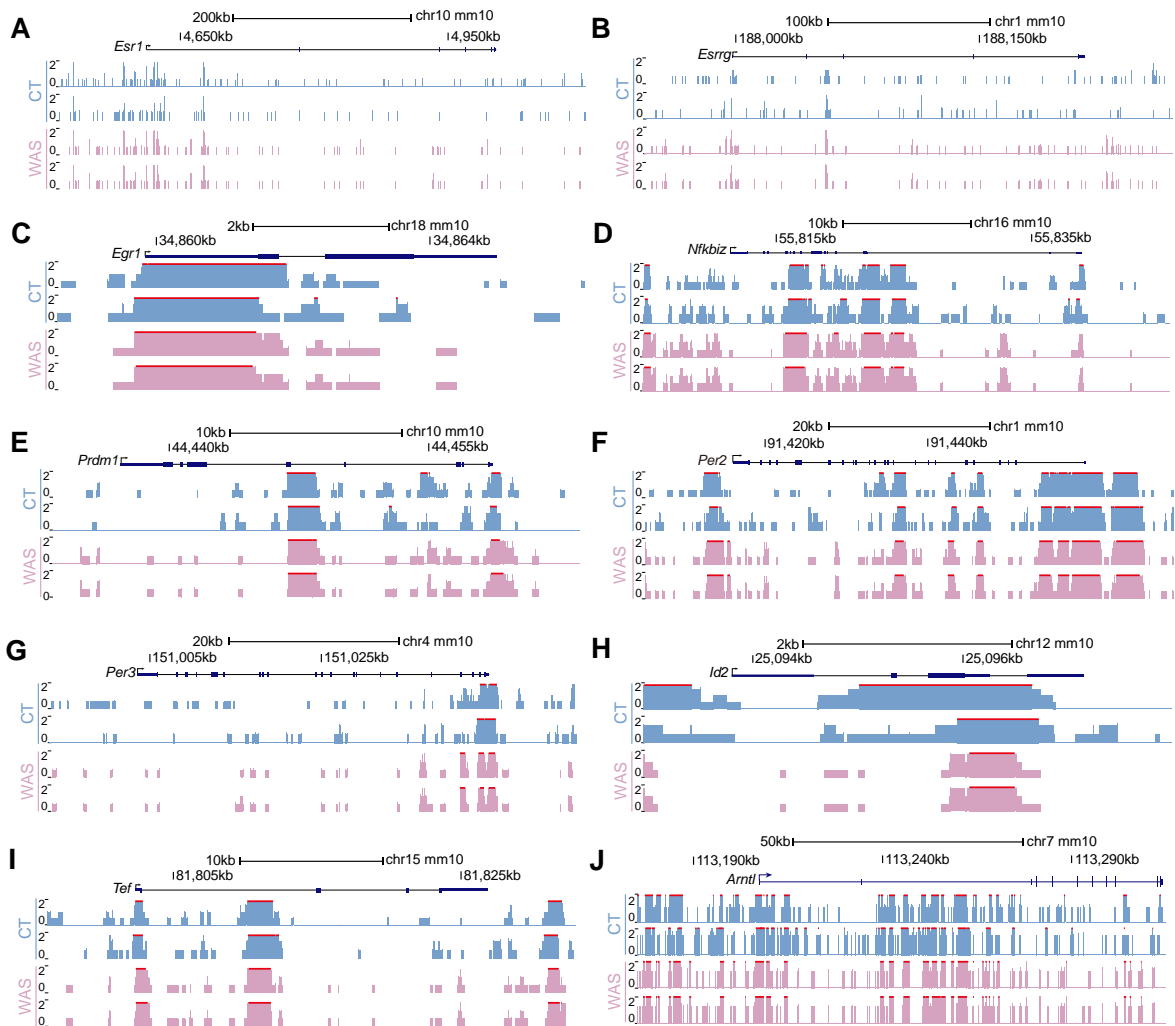

**Figure S5. GR binding along the gene bodies of TF DEGs identified in *Nr3c1*<sup>ΔIEC</sup> mice,**

**Related to Figure 6**

(A-J) GR binding along the *Esr1*, *Esrrg*, *Egr1*, *Nfkbiz*, *Prdm1*, *Per2*, *Per3*, *Id2*, *Tef*, and *Arntl/Bmal1* highlighted GR downstream transcriptional network involved in circadian-stress crosstalk. CT (control) and WAS (water avoidance stress) mice GR cistrome data are visualized.

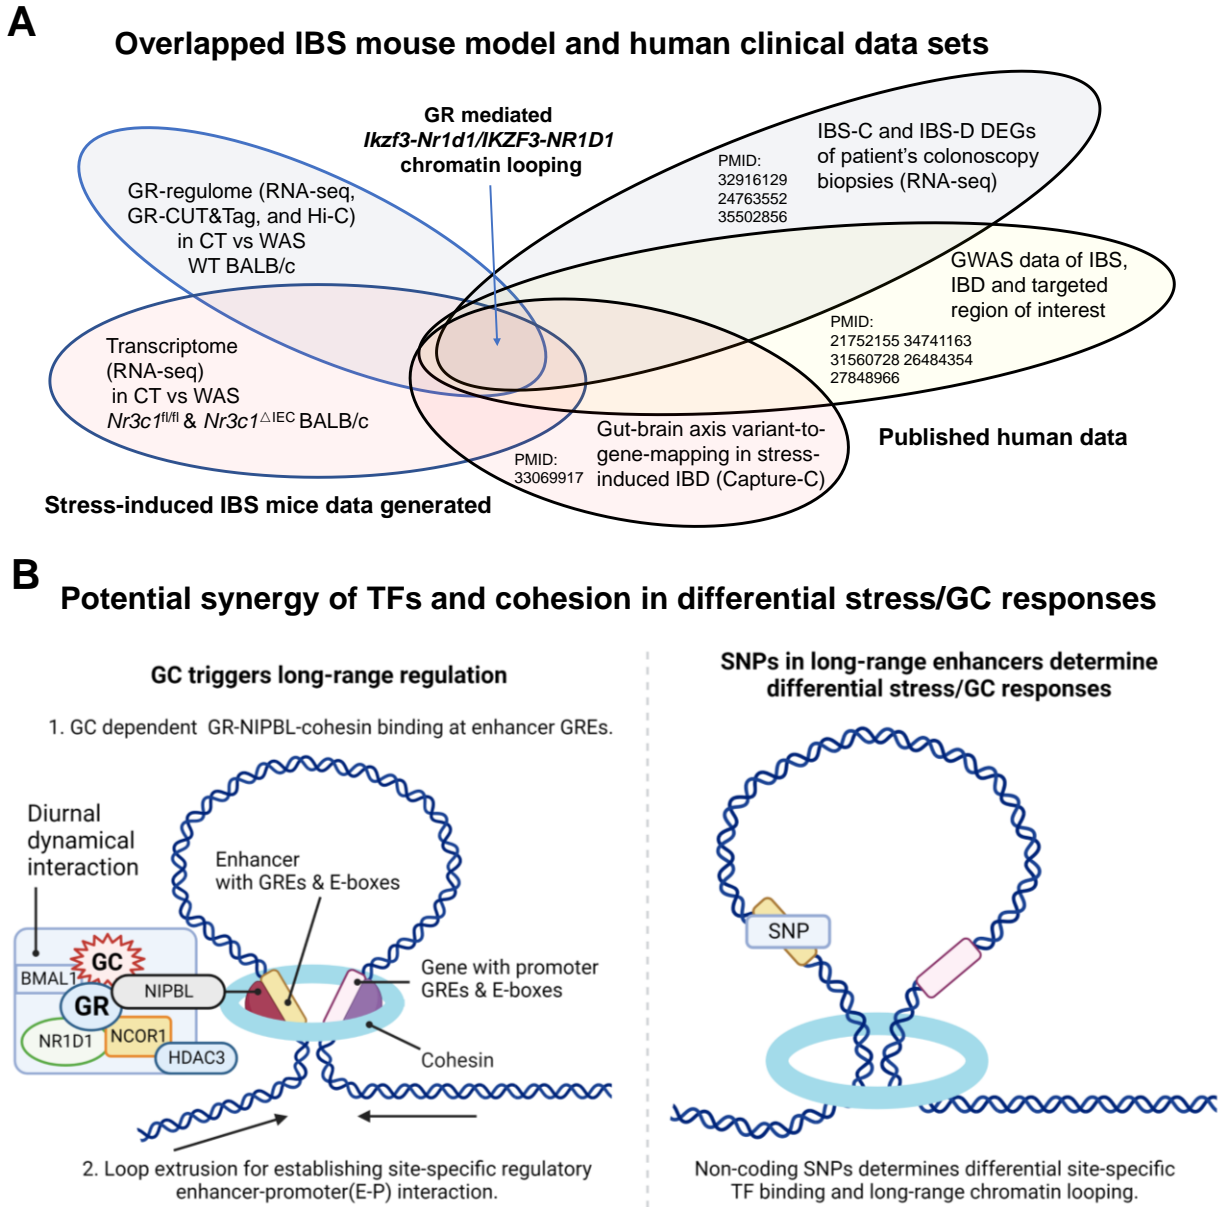

**Figure S6. Translation potential of this stress-induced IBS mouse model dataset**

(A) Overlapped stress-induced IBS mouse data with human data sets highlighted conserved *Ikzf3-Nr1d1/IKZF3-NR1D1* chromatin circadian misalignment.

(B) Potential mechanism by which long-range enhancer SNPs determine differential stress/glucocorticoid responses. Transcription factors (BMAL1/NR1D1/GR), cohesin loader NIPBL, cofactor (NCOR1), and chromatin remodeler (HDAC3) form protein complex load



cohesin to establish site-specific enhancer-promoter loops for long-range regulation. SNPs in long-range enhancers of GR target genes cause differential transcription factor binding and chromatin looping.

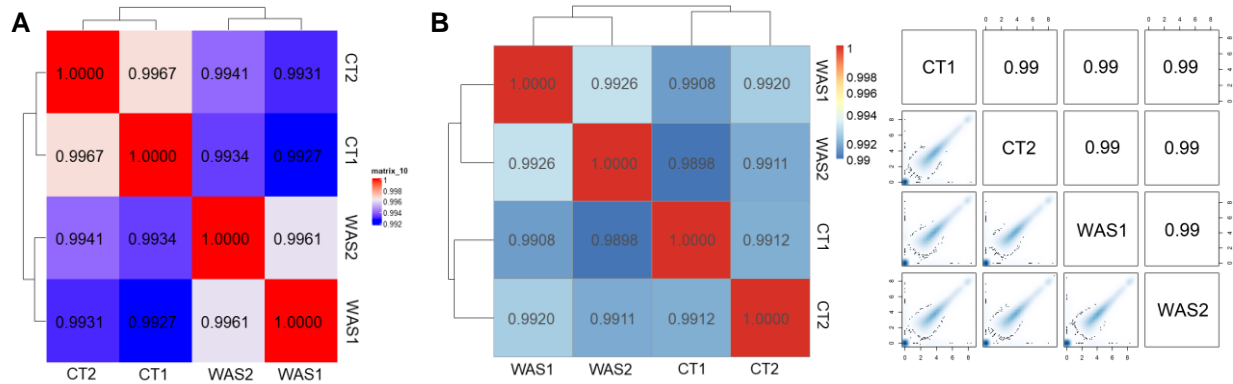

**Figure S7. 1 M resolution matrix correlation analysis of BL-Hi-C data generated from two CT (control) and two WAS (water avoidance stress) BALB/c mice, Related to STAR Methods**

1 M resolution matrix correlation was performed with two methods (A: hicap; B: hicLibRepeatCor). Differences between each mouse were <1%; however, data within each group showed closer correlations.

## Supplementary Tables

**Table S1. The histologic scoring system, Related to STAR Methods**

| <b>Inflammation</b>                                       | <b>Crypt Injury</b>                | <b>Ulceration</b>                | <b>Score</b> |
|-----------------------------------------------------------|------------------------------------|----------------------------------|--------------|
| No significant inflammation                               | No injury                          | No ulceration                    | 0            |
| Neutrophilic inflammation in epithelium or lamina propria | Loss of basal one third of crypts  | Two or fewer foci of ulceration  | 1            |
| Inflammatory cells extending into submucosa               | Loss of basal two thirds of crypts | Three or four foci of ulceration | 2            |
| Transmural inflammation                                   | Loss of full thickness crypts      | Diffuse/confluent ulceration     | 3            |

**Table S2. BL-Hi-C trimming step, Related to STAR Methods**

|                         | <b>CT1</b> | <b>CT2</b> | <b>WAS1</b> | <b>WAS2</b> |
|-------------------------|------------|------------|-------------|-------------|
| <b>Total_PETs</b>       | 1100152888 | 1104533758 | 931979552   | 1133499189  |
| <b>Expect_PETs</b>      | 982095283  | 1001781230 | 863015819   | 1019164130  |
| <b>Expect_both_PETs</b> | 258630025  | 241737666  | 252839184   | 259293712   |
| <b>Chim_PETs</b>        | 39734122   | 41877180   | 27010195    | 51223027    |
| <b>1Empty_PETs</b>      | 633625069  | 662525658  | 511640710   | 655985754   |
| <b>2Empty_PETs</b>      | 89840189   | 97517906   | 98535925    | 103884664   |
| <b>Valid_PETs</b>       | 547085785  | 549986750  | 509131735   | 615445192   |

**Table S3. BL-Hi-C mapping results, Related to STAR Methods**

|                                      | CT1       | CT1<br>rate | CT2       | CT2<br>rate | WAS1      | WAS1<br>rate | WAS2      | WAS2<br>rate |
|--------------------------------------|-----------|-------------|-----------|-------------|-----------|--------------|-----------|--------------|
| <b>Total_pairs_processed</b>         | 547085785 | 100         | 549986750 | 100         | 509131735 | 100          | 615445192 | 100          |
| <b>Unmapped_pairs</b>                | 17142671  | 3.133       | 16784184  | 3.052       | 15791545  | 3.102        | 19071567  | 3.099        |
| <b>Low_qual_pairs</b>                | 174552395 | 31.906      | 173364376 | 31.522      | 162230523 | 31.864       | 195446491 | 31.757       |
| <b>Unique_paired_alignments</b>      | 219574167 | 40.135      | 221269574 | 40.232      | 208748132 | 41.001       | 243609388 | 39.583       |
| <b>Multiple_pairs_alignments</b>     | 0         | 0           | 0         | 0           | 0         | 0            | 0         | 0            |
| <b>Pairs_with_singleton</b>          | 135816552 | 24.825      | 138568616 | 25.195      | 122361535 | 24.033       | 157317746 | 25.562       |
| <b>Low_qual_singleton</b>            | 0         | 0           | 0         | 0           | 0         | 0            | 0         | 0            |
| <b>Unique_singleton_alignments</b>   | 0         | 0           | 0         | 0           | 0         | 0            | 0         | 0            |
| <b>Multiple_singleton_alignments</b> | 0         | 0           | 0         | 0           | 0         | 0            | 0         | 0            |
| <b>Reported_pairs</b>                | 219574167 | 40.135      | 221269574 | 40.232      | 208748132 | 41.001       | 243609388 | 39.583       |

**Table S4. List of valid BL-Hi-C interaction products, Related to STAR Methods**

|                                   | CT1       | CT2       | WAS1      | WAS2      |
|-----------------------------------|-----------|-----------|-----------|-----------|
| <b>Valid_interaction_pairs</b>    | 197904079 | 198544667 | 179529211 | 221337806 |
| <b>Valid_interaction_pairs_FF</b> | 49480981  | 49627423  | 44865807  | 55422565  |
| <b>Valid_interaction_pairs_RR</b> | 49356184  | 49529530  | 44787979  | 55209141  |
| <b>Valid_interaction_pairs_RF</b> | 49275321  | 49414216  | 44722878  | 55083669  |
| <b>Valid_interaction_pairs_FR</b> | 49791593  | 49973498  | 45152547  | 55622431  |
| <b>Dangling_end_pairs</b>         | 19452188  | 20275202  | 26889807  | 19866293  |
| <b>Religation_pairs</b>           | 2142441   | 2356423   | 2263951   | 2326167   |
| <b>Self_Cycle_pairs</b>           | 46843     | 54695     | 41064     | 56560     |
| <b>Single-end_pairs</b>           | 0         | 0         | 0         | 0         |
| <b>Filtered_pairs</b>             | 0         | 0         | 0         | 0         |
| <b>Dumped_pairs</b>               | 28616     | 38587     | 24099     | 22562     |

**Table S5. Intra and inter-chromosomal contact maps, Related to STAR Methods**

|                                | <b>CT1</b> | <b>CT2</b> | <b>WAS1</b> | <b>WAS2</b> |
|--------------------------------|------------|------------|-------------|-------------|
| <b>valid_interaction</b>       | 197904079  | 198544667  | 179529211   | 221337806   |
| <b>valid_interaction_rmdup</b> | 44817997   | 45210449   | 66433088    | 47594763    |
| <b>trans_interaction</b>       | 28464631   | 27596849   | 42461050    | 31031663    |
| <b>cis_interaction</b>         | 16353366   | 17613600   | 23972038    | 16563100    |
| <b>cis_shortRange</b>          | 3124209    | 3496740    | 4376450     | 3021581     |
| <b>cis_longRange</b>           | 13229157   | 14116860   | 19595588    | 13541519    |
